# Supplementary material for: The m6A Reader YTHDF1 Accelerates the Osteogenesis of Bone Marrow Mesenchymal Stem Cells Partly via Activation of the Autophagy Signaling Pathway
Source: Hindawi journal article supplement (doi:10.1155/2023/5563568), 2023-07-25
Supplement: f1 [file 5563568.f1.pdf]

A

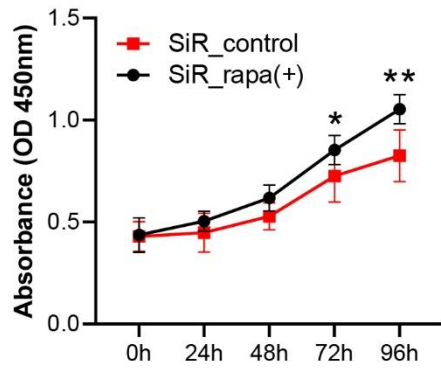

B

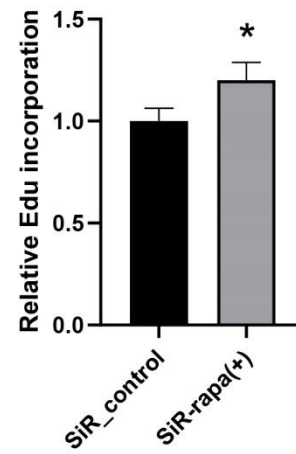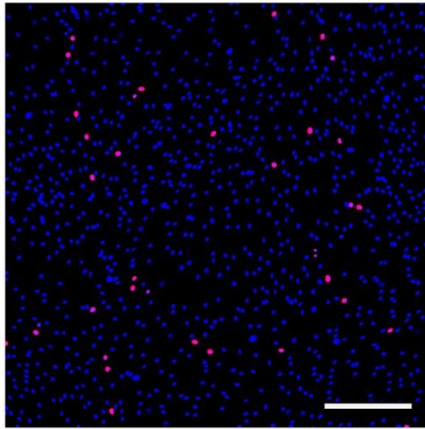

SiR-control

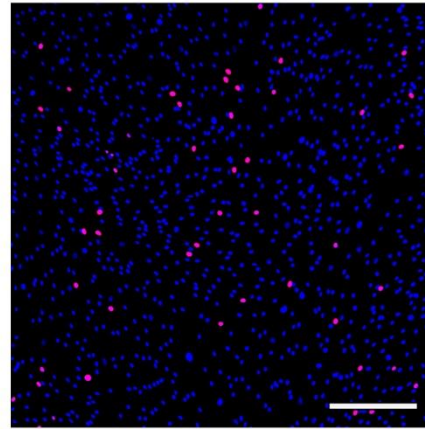

SiR-rapa(+)

Supplementary FIGURE S1: Rapamycin as an autophagy inducer increased cell proliferation in YTHDF1-knockdownBMSCs. The CCK-8 assay (a) and EdU incorporation assay (b) of YTHDF1-downregulated BMSCs following rapamycin treatment on days 3. Scale bar: 200 $\mu$ m. \* $P < 0.05$ , \*\*  $P < 0.01$  compared to the control group.

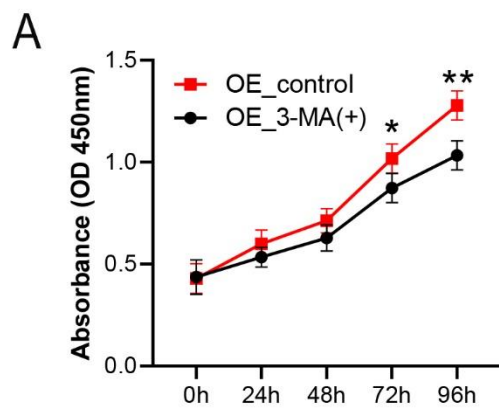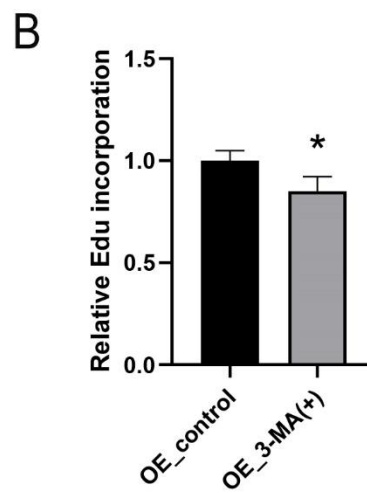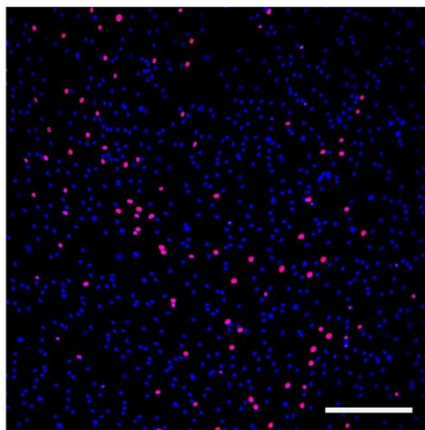

OE\_control

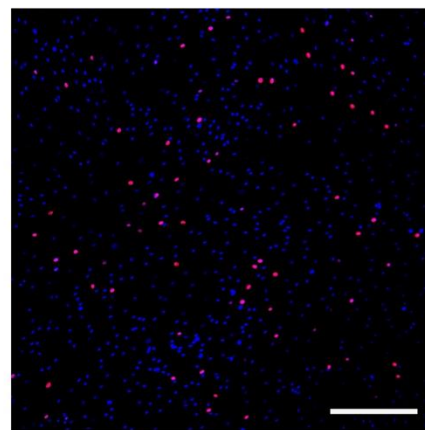

OE\_3-MA(+)

Supplementary FIGURE S2: Inhibition of autophagy reduced cell proliferation in YTHDF1-upregulated BMSCs. The CCK-8 assay (a) and EdU incorporation assay (b) of YTHDF1-upregulated BMSCs following 3-MA treatment on days 3. Scale bar: 200 $\mu$ m. \* $P < 0.05$ , \*\*  $P < 0.01$  compared to the control group.
